# Supplementary material
Source: PubMed Central journal article supplement (PMC3979525)
Supplement: NIHMS398134-supplement-1_si_001.pdf [file NIHMS398134-supplement-1_si_001.pdf]

**Table S11. List of PRISM Interaction Predictions for p53 Network.** Out of 251 PRISM interaction predictions, 26 are present in Kohn's map, 59 are present in various PPI databases and 90 are present in STRING database. 104 interactions are validated totally.

| PPI PREDICTIONS | INTERFACE | DATABASES  |
|-----------------|-----------|------------|
| APC - E2F1      | 1gl2AD    |            |
| APC - CCNH      | 1vf6BD    |            |
| APC - TFDP1     | 1gl2AD    |            |
| APC - CCNA2     | 1jsuBC    |            |
| APC - JUN       | 1gl2AD    |            |
| APC - MAPK10    | 1pq1AB    |            |
| APC - BRCA1     | 1jsuBC    |            |
| APC - RFC5      | 1jsuBC    |            |
| APC - XRCC6     | 1rkeAB    |            |
| APC - CCNE1     | 1rkeAB    |            |
| APC - POLR2G    | 1cxzAB    |            |
| APC - RB1       | 1jsuBC    |            |
| APC - GTF2H1    | 1jsuBC    |            |
| APC - EP300     | 1g4yBR    |            |
| APC - LIG1      | 1jsuBC    |            |
| APC - PARP1     | 1jsuBC    |            |
| APC - EP300     | 1hx1AB    |            |
| APC - CCNB1     | 1jsuBC    | KOHN'S MAP |
| APC - RPA1      | 1jsuBC    |            |
| APC - KAT2B     | 1rkeAB    |            |
| APC - MAX       | 1gl2AD    |            |
| APC - MDM2      | 1rkeAB    |            |
| APC - MYC       | 1gl2AD    | MINT       |
| APC - XRCC1     | 1jsuBC    |            |
| APC - HMGB1     | 1g4yBR    |            |
| APC - FOS       | 1gl2AD    |            |
| APC - MYC       | 1jsuBC    | MINT       |
| APC - RAD52     | 1pq1AB    |            |
| BAX - XRCC5     | 1nw9AB    |            |
| BAX - RAF1      | 1wmhAB    | STRING     |
| BAX - EP300     | 1rkeAB    | STRING     |
| CCNA2 - XRCC5   | 2ahmCG    |            |
| CCNA2 - EP300   | 1rkeAB    | STRING     |
| CCNB1 - RPA3    | 1quqCD    |            |
| CCNB1 - CCNE1   | 1gveAB    |            |
| CCND1 - MYC     | 1jsuBC    | STRING     |
| CCND1 - CDKN1B  | 1jsuBC    | KOHN'S MAP |

|                |        |                   |
|----------------|--------|-------------------|
| CCNE1 - RPA3   | 1quqCD |                   |
| CCNE1 - MAPK8  | 1w36CD |                   |
| CCNE1 - MNAT1  | 1gveAB | STRING            |
| CCNE1 - CDK5   | 1unlAD |                   |
| CCNE1 - CASP3  | 1gveAB | STRING            |
| CCNE1 - CDK5   | 1gveAB |                   |
| CCNE1 - EP300  | 1rkeAB | KOHN'S MAP        |
| CCNE1 - CHEK1  | 1unlAD |                   |
| CCNH - MYC     | 1jsuBC | BIOGRID           |
| CDK1 - CKS1B   | 1buhAB | KOHN'S MAP        |
| CDK2 - PLK1    | 1rkeAB | INTACT            |
| CDK2 - ABL1    | 1rkeAB | INTACT            |
| CDK2 - APC     | 1rkeAB |                   |
| CDK2 - MAPK9   | 2btfAP |                   |
| CDK2 - SFN     | 1rkeAB |                   |
| CDK2 - CCNE1   | 1rkeAB | KOHN'S MAP        |
| CDK2 - CCNE1   | 1unlAD | KOHN'S MAP        |
| CDK2 - RB1     | 1nw9AB | KOHN'S MAP        |
| CDK2 - TFDP2   | 1rkeAB | KOHN'S MAP        |
| CDK2 - SKP2    | 1unlAD | KOHN'S MAP        |
| CDK2 - EP300   | 1rkeAB | KOHN'S MAP        |
| CDK2 - RPA3    | 1rkeAB | KOHN'S MAP        |
| CDK2 - BAX     | 1rkeAB | STRING            |
| CDK2 - E2F1    | 1e8oCD | KOHN'S MAP        |
| CDK2 - CCNB1   | 1oiyBC | BIOGRID           |
| CDK2 - CKS1B   | 1buhAB | KOHN'S MAP        |
| CDK2 - XRCC5   | 1oiyBC |                   |
| CDK2 - MARK3   | 1oiyBC | INTACT            |
| CDK4 - CDKN2D  | 1blxAB | BIOGRID           |
| CDK4 - CSNK2A2 | 1buhAB |                   |
| CDK4 - XRCC5   | 1rkeAB |                   |
| CDK4 - CDKN2D  | 1e8oCD | BIOGRID           |
| CDK4 - MYC     | 1jsuBC | NCI-NATURE<br>PID |
| CDK4 - MAPK10  | 1buhAB |                   |
| CDK4 - KAT2B   | 1a9nAB |                   |
| CDK4 - ABL1    | 1gveAB |                   |
| CDK4 - CDK6    | 1buhAB | CELL-MAP          |
| CDK6 - CKS1B   | 1buhAB |                   |
| CDK6 - CCNE1   | 1unlAD | STRING            |
| CDK6 - RAD51   | 1unlAD |                   |
| CDK6 - RAF1    | 1wywAB |                   |
| CDK7 - CCND1   | 1xg2AB | STRING            |

|                 |        |                 |
|-----------------|--------|-----------------|
| CDK7 - RB1      | 1unlAD | STRING          |
| CDK7 - RAD52    | 1lqbAB |                 |
| CDK7 - MYC      | 1jsuBC | STRING          |
| CDK7 - HDAC1    | 1unlAD |                 |
| CDK7 - CDKN2D   | 1blxAB |                 |
| CDK7 - CKS1B    | 1buhAB |                 |
| CDKN1B - RAD52  | 1jsuBC |                 |
| CDKN1B - CCNE1  | 1jsuBC | BIOGRID         |
| CDKN1B - WEE1   | 1jsuBC | STRING          |
| CDKN1B - CDH1   | 1jsuBC | STRING          |
| CDKN1B - CCNB1  | 1jsuBC | INTACT          |
| CDKN1B - CCNA2  | 1jsuBC | KOHN'S MAP      |
| CDKN1B - RB1    | 1jsuBC | PATHWAY COMMONS |
| CDKN2A - TP53   | 1lqbAB | BIOGRID         |
| CDKN2A - CHEK1  | 1blxAB |                 |
| CDKN2D - MAPK8  | 1blxAB |                 |
| CDKN2D - CDH1   | 1rypMN |                 |
| CDKN2D - CDKN1B | 1jsuBC | STRING          |
| CDKN2D - CCNA2  | 1e8oCD |                 |
| CDKN2D - CCNB1  | 1e8oCD |                 |
| CDKN2D - CDK6   | 1blxAB | BIOGRID         |
| CDKN2D - CHEK1  | 1blxAB |                 |
| CDKN2D - MAPK9  | 1blxAB |                 |
| CKS1B - MAPK10  | 1buhAB |                 |
| CRK - RPA3      | 1quqCD |                 |
| CSNK2A1 - CKS1B | 1buhAB |                 |
| CSNK2A2 - CKS1B | 1buhAB |                 |
| E2F1 - SFN      | 1e8oCD |                 |
| E2F1 - CDH1     | 1e8oCD |                 |
| E2F1 - RPA2     | 2c38SV | STRING          |
| E2F1 - EP300    | 2ahmCG | KOHN'S MAP      |
| E2F1 - NFKBIA   | 2ahmCG | STRING          |
| E2F1 - EP300    | 1gl2AD | KOHN'S MAP      |
| E2F1 - XRCC5    | 2ahmCG |                 |
| E2F1 - WEE1     | 1e8oCD |                 |

|                  |        |            |
|------------------|--------|------------|
| E2F1 - MAX       | 1gl2AD |            |
| E2F4 - XRCC5     | 1rkeAB |            |
| EP300 - MAX      | 2ahmCG | BIOGRID    |
| EP300 - ABL1     | 1rkeAB | MINT       |
| ERCC1 - MYC      | 1jsuBC |            |
| ERCC1 - EP300    | 1rkeAB |            |
| ERCC1 - JUN      | 2ahmCG |            |
| ERCC1 - RPA3     | 1quqCD | KOHN'S MAP |
| ERCC1 - MAX      | 2ahmCG |            |
| ERCC1 - APC      | 1hx1AB |            |
| ERCC1 - CDKN1B   | 1jsuBC |            |
| ERCC4 - SKP2     | 2astBC |            |
| ERCC4 - CDKN1B   | 1jsuBC |            |
| FOS - E2F1       | 1gl2AD | STRING     |
| FOS - RFC5       | 1gl2AD |            |
| GADD45A - RAPIA  | 1c1yAB |            |
| GADD45A - CDKN2D | 1gveAB |            |
| GADD45A - NFKB1  | 1gveAB | STRING     |
| GADD45A - SFN    | 1gveAB |            |
| GADD45A - BAX    | 1gveAB | STRING     |
| GADD45A - MNAT1  | 1gveAB |            |
| GADD45A - APC    | 1gveAB |            |
| GADD45A - PLK1   | 1gveAB |            |
| GADD45A - MAPK8  | 1lqbAB | STRING     |
| GPIHBP1 - APC    | 1pq1AB |            |
| GPIHBP1 - CDK2   | 1rkeAB |            |
| GTF2H1 - CDKN1B  | 1jsuBC |            |
| HDAC1 - XRCC5    | 1n62DF | STRING     |
| HDAC1 - CDK1     | 1unlAD | BIOGRID    |
| HDAC1 - CDK6     | 1unlAD | STRING     |
| JUN - POLR2G     | 2ahmCG |            |
| JUN - E2F1       | 1gl2AD | STRING     |
| JUN - EP300      | 2ahmCG | BIOGRID    |
| JUN - XRCC5      | 2ahmCG |            |
| JUN - RAD51      | 2ahmCG |            |
| JUN - SFN        | 2ahmCG |            |
| JUN - MARK3      | 2ahmCG |            |
| LIG3 - SFN       | 1e8oCD |            |

|                    |        |                    |
|--------------------|--------|--------------------|
| LIG3 - RAD23B      | 1tf0AB |                    |
| MAPK8 - RPA3       | 1lqbAB |                    |
| MAPK9 - E2F4       | 2btfAP |                    |
| MDM2 - CCNA2       | 1nw9AB | KOHN'S MAP         |
| MYC - CCNE1        | 1jsuBC | STRING             |
| MYC - RAD52        | 1pq1AB |                    |
| MYC - MAX          | 3ezeAB | KOHN'S MAP         |
| MYC - CCNB1        | 1jsuBC | STRING             |
| MYC - RB1          | 1jsuBC | BIOGRID            |
| MYC - CDH1         | 1jsuBC | STRING             |
| MYC - CCNA2        | 1jsuBC | STRING             |
| MYC - CDKN1B       | 1jsuBC | INTACT             |
| MYC - E2F1         | 1gl2AD | STRING             |
| PARP1 - XRCC5      | 2ahmCG | BIOGRID            |
| PARP1 - RAF1       | 1wmhAB | STRING             |
| PARP1 - CDKN1B     | 1jsuBC | STRING             |
| PARP1 - SKP2       | 3ezeAB |                    |
| PARP1 - CHEK1      | 1unlAD | MINT               |
| PARP1 - CCNH       | 1jsuBC |                    |
| PARP1 - E2F1       | 2ahmCG | INTACT             |
| PARP1 - NFKBIA     | 3ezeAB | STRING             |
| PARP1 - CDH1       | 1jsuBC |                    |
| PARP1 - MYC        | 1jsuBC | STRING             |
| PCNA - BRCA1       | 1xkpAC | NCI-NATURE<br>PID  |
| PCNA - CDKN1B      | 1pq1AB | STRING             |
| PCNA - NFKB1       | 1h9sAB | PATHWAY<br>COMMONS |
| PLK1 - RPA3        | 1quqCD |                    |
| PLK1 - CDH1        | 1lqbAB | STRING             |
| POLR2D - CDK5      | 1gveAB |                    |
| POLR2G - MAPK9     | 2btfAP |                    |
| POLR2G - TFDP1     | 2btfAP |                    |
| POLR2G - RPA3      | 2btfAP |                    |
| POLR2G - E2F4      | 2btfAP |                    |
| RAD23B - TFDP2     | 1fxtAB |                    |
| RAD23B -<br>CDKN1B | 1jsuBC |                    |
| RAD51 - XRCC5      | 1rkeAB | STRING             |
| RAD51 - SFN        | 3ezeAB |                    |
| RAD51 - SFN        | 1gveAB |                    |
| RAF1 - RAP1A       | 1clyAB | KOHN'S MAP         |
| RAF1 - RAD52       | 1lqbAB |                    |
| RAF1 - SKP2        | 1wmhAB |                    |

|                |        |            |
|----------------|--------|------------|
| RAF1 - FEN1    | 1wywAB |            |
| RAF1 - RAD51   | 1wmhAB |            |
| RAP1A - CDH1   | 1clyAB |            |
| RB1 - WEE1     | 1unlAD |            |
| RB1 - PARP1    | 1gh6AB | STRING     |
| RB1 - RAD23B   | 1tf0AB |            |
| RELA - SFN     | 1rkeAB | STRING     |
| RELA - BRCA1   | 1xkpAC | BIOGRID    |
| RELA - NFKBIA  | 1oy3CD | BIOGRID    |
| RFC1 - XRCC5   | 1nw9AB | BIOGRID    |
| RFC5 - RAD51   | 1gveAB |            |
| RFC5 - RAD51   | 1t08AB |            |
| RFC5 - CDK6    | 1l0oBC |            |
| RFC5 - MYC     | 1jsuBC |            |
| RFC5 - PLK1    | 1gveAB | MINT       |
| RFC5 - EP300   | 1rkeAB |            |
| RFC5 - CSNK2A2 | 1gveAB |            |
| RFC5 - XRCC6   | 1gveAB | INTACT     |
| RFC5 - MAX     | 1gl2AD |            |
| RFC5 - CDKN1B  | 1jsuBC |            |
| RFC5 - MYC     | 1gl2AD |            |
| RFC5 - XRCC6   | 1rkeAB | INTACT     |
| RFC5 - CSNK2A1 | 1gveAB |            |
| RFC5 - CCNE1   | 1gveAB |            |
| RFC5 - E2F1    | 1gl2AD |            |
| RPA1 - RPA2    | 1l1oEF | BIOGRID    |
| RPA1 - XRCC5   | 1rkeAB | MINT       |
| RPA1 - RPA3    | 1quqCD | BIOGRID    |
| RPA1 - E2F1    | 1e8oCD |            |
| RPA1 - CCNA2   | 1lqbAB | BIOGRID    |
| RPA1 - CDKN1B  | 1jsuBC |            |
| RPA2 - RPA3    | 1quqCD | BIOGRID    |
| SKP1 - RPA3    | 1quqCD |            |
| SKP1 - E2F1    | 2c38SV |            |
| SKP2 - SKP1    | 2astAB | KOHN'S MAP |
| SKP2 - CCNE1   | 1gveAB | BIOGRID    |
| SKP2 - CKS1B   | 2astBC | BIOGRID    |
| SKP2 - SKP1    | 1fs2AD | KOHN'S MAP |
| SKP2 - CDK5    | 1unlAD |            |
| TAF1 - ERCC4   | 1lkyAB |            |
| TAF1 - RPA3    | 1quqCD |            |
| TAF1 - CDK4    | 1blxAB |            |
| TFDP1 - XRCC5  | 1rkeAB |            |

|                |        |            |
|----------------|--------|------------|
| TFDP1 - EP300  | 1rkeAB |            |
| TFDP2 - RB1    | 1j2jAB | KOHN'S MAP |
| TFDP2 - EP300  | 1rkeAB |            |
| TFDP2 - E2F4   | 1cf7AB | KOHN'S MAP |
| TP53 - TP53BP2 | 1ycaAB | BIOGRID    |
| XPA - CDKN1B   | 1jsuBC |            |
| XRCC1 - CCNE1  | 1gveAB |            |
| XRCC1 - EP300  | 1h9sAB |            |
| XRCC1 - CDKN1B | 1jsuBC |            |
| XRCC1 - PLK1   | 1gveAB |            |
| XRCC1 - MYC    | 1jsuBC |            |
| XRCC1 - CDH1   | 1tueFG |            |
| XRCC5 - ABL1   | 1rkeAB | KOHN'S MAP |
| XRCC6 - MDM2   | 1rkeAB | STRING     |
| XRCC6 - MNAT1  | 1gveAB |            |

**Table S12. PRISM Predictions for 15 Interactions with Available PDB Structures.** There are 15 interaction predictions in the p53 P2IN, which have PDB structures in complex form. Out of these interactions, PRISM made 13 correct predictions.

| PREDICTED INTERACTION | PREDICTION STATUS    | PDB ID |
|-----------------------|----------------------|--------|
| CDK2 - CKS1B          | CORRECTLY PREDICTED  | 1BUH   |
| CDK2 - CCNE1          | CORRECTLY PREDICTED  | 1W98   |
| CDK2 - CCNB1          | INCORRECT PREDICTION | 2JGZ   |
| CDKN1B - CCNA2        | CORRECTLY PREDICTED  | 1JSU   |
| CDKN2D - CDK6         | CORRECTLY PREDICTED  | 1BLX   |
| MYC - MAX             | CORRECTLY PREDICTED  | 1NKP   |
| RAF1 - RAP1A          | CORRECTLY PREDICTED  | 1C1Y   |
| RELA - NFKBIA         | INCORRECT PREDICTION | 1NFI   |
| RPA1 - RPA2           | CORRECTLY PREDICTED  | 1L1O   |
| RPA1 - RPA3           | CORRECTLY PREDICTED  | 1L1O   |
| RPA2 - RPA3           | CORRECTLY PREDICTED  | 1L1O   |
| SKP1 - SKP2           | CORRECTLY PREDICTED  | 2AST   |
| SKP2 - CKS1B          | CORRECTLY PREDICTED  | 2AST   |
| TFDP2 - E2F4          | CORRECTLY PREDICTED  | 1CF7   |
| TP53 - TP53BP2        | CORRECTLY PREDICTED  | 1YCS   |

**Table S13. Protein List of Kohn's MIM.** Kohn's molecular interaction map (MIM) has some nodes that do not have a protein counterpart, or some nodes correspond to multiple proteins. We updated Kohn's MIM's nodes by removing or expanding some of them.

| <b>KOHN'S ORIGINAL NODES</b> | <b>KOHN'S NODES UPDATED</b> |
|------------------------------|-----------------------------|
| 14 3 3                       | SFN                         |
| Abl                          | ABL1                        |
| APC                          | APC                         |
| Bax                          | BAX                         |
| BRCA1                        | BRCA1                       |
| Casp3                        | CASP3                       |
| CycA                         | CCNA2                       |
| CycB                         | CCNB1                       |
| CycD                         | CCND1                       |
| CycE                         | CCNE1                       |
| CycH                         | CCNH                        |
| E-cad                        | CDH1                        |
| Cdk1                         | CDK1                        |
| Cdk2                         | CDK2                        |
| Cdk4-6                       | CDK4, CDK5, CDK6            |
| Cdk7                         | CDK7                        |
| p16                          | CDKN2A                      |
| p19ARF                       | CDKN2A                      |
| Chk1                         | CHEK1                       |
| Cks1                         | CKS1B                       |
| Crk                          | CRK                         |
| E2F1-2-3                     | E2F1                        |
| E2F4                         | E2F4                        |
| ERCC1                        | ERCC1                       |
| XPF                          | ERCC4                       |
| Fos                          | FOS                         |
| HDAC1                        | HDAC1                       |
| DP1-2                        | TFDP1, TFDP2                |
| JNK                          | MAPK8, MAPK9,               |
| MAPK                         | MAPK8, MAPK9,               |
| FEN-1                        | FEN1                        |
| C-TAK1                       | MARK3                       |
| HMG                          | HMGB1                       |
| HR23B                        | RAD23B                      |
| Jun                          | JUN                         |
| Mdm2                         | MDM2                        |
| Gadd45                       | GADD45A                     |
| Ligase 1                     | LIG1                        |
| Ligase 3                     | LIG3                        |
| Max                          | MAX                         |
| Myc                          | MYC                         |
| RPA                          | RPA1, RPA2, RPA3            |
| CK2                          | CSNK2A1, CSNK2A2            |
| p27                          | CDKN1B                      |
| p300                         | EP300                       |
| p36MAT1                      | MNAT1                       |
| p53                          | TP53                        |
| PARP                         | PARP1                       |
| pCAF                         | KAT2B                       |
| PCNA                         | PCNA                        |
| Plk1                         | PLK1                        |



|          |                 |
|----------|-----------------|
| pRb      | RB1             |
| Rad51    | RAD51           |
| Rad52    | RAD52           |
| Raf1     | RAF1            |
| Ras      | RAP1A           |
| RF-C     | RFC1            |
| RPase 2  | POLR2D          |
| Skp1     | SKP1            |
| Skp2     | SKP2            |
| TAFII250 | TAF1            |
| TFIIH    | GTF2H1          |
| Wee1     | WEE1            |
| XPA      | XPA             |
| XRCC1    | XRCC1           |
| Ku70     | XRCC6           |
| Ku80     | XRCC5           |
| AP2      | TFAP2A, TFAP2B, |
| ATM      | ATM             |
| Cdc25A   | CDC25A          |
| Cdc25C   | CDC25B          |
| C-EBP    | CEBPA, CEBPB,   |
| CK1d-k   | CSNK1D, CSNK1E  |
| CSB      | ERCC6           |
| HBP1     | GPIHBP1         |
| Dpase a  | POLA1, POLA2    |
| DMP1     | DMTF1           |
| Dpase b  | POLB            |
| Dpase d  | POLD1, POLD2,   |
| dsDNA    | -               |
| E2F6     | E2F6            |
| DNA-PK   | PRKDC           |
| Histones | -               |
| Karp-1   | KARP-1          |
| E2F5     | E2F5            |
| p57      | CDKN1C          |
| p68      | -               |
| Paxillin | PXN             |
| PKC      | PRKCA, PRKCB    |
| Rep fork | -               |
| RHA      | -               |
| SL1      | TAF1A           |
| Sp1      | SP1             |
| ssb      | -               |
| ssDNA    | -               |
| U-glyc   | UNG             |
| Myt1     | PKMYT1          |
| p107     | RBL1            |
| p130     | RBL2            |
| XPB      | ERCC3           |
| XPC      | XPC             |
| XPD      | ERCC2           |
| p21      | CDKN1A          |
| TBP      | TBP             |

**Table S14. The Updated Interactions' List of Kohn's MIM.** If a node was replaced with multiple proteins, the number of interactions automatically increased. We searched STRING database for validating the new edges and picked the ones, which were coming from high throughput experiments or databases.

| INTERACTION     | STRING PREDICTION METHOD | INTERACTION     | STRING PREDICTION METHOD |
|-----------------|--------------------------|-----------------|--------------------------|
| TFAP2A ppi MYC  | EXPERIMENTS              | TFDP1 ppi E2F6  | EXPERIMENTS              |
| TFAP2B ppi MYC  | EXPERIMENTS              | TFDP2 ppi E2F6  | EXPERIMENTS              |
| TFAP2A ppi RB1  | EXPERIMENTS              | TFDP1 ppi RBL1  | EXPERIMENTS              |
| CSNK1D ppi TP53 | EXPERIMENTS              | TFDP2 ppi RBL1  | EXPERIMENTS              |
| CSNK1E ppi TP53 | EXPERIMENTS              | TFDP1 ppi RBL2  | EXPERIMENTS              |
| TP53 ppi PRKCA  | EXPERIMENTS              | TFDP2 ppi RBL2  | EXPERIMENTS              |
| PARP1 ppi POLA1 | EXPERIMENTS              | TFDP1 ppi CCNA2 | DATABASES                |
| PARP1 ppi POLA2 | EXPERIMENTS              | TFDP2 ppi CCNA2 | DATABASES                |
| PCNA ppi POLD1  | EXPERIMENTS              | TFDP1 ppi CDK2  | DATABASES                |
| PCNA ppi POLD2  | EXPERIMENTS              | TFDP2 ppi CDK2  | DATABASES                |
| PCNA ppi POLD3  | EXPERIMENTS              | TP53 ppi TFDP1  | EXPERIMENTS              |
| PCNA ppi POLD4  | EXPERIMENTS              | RB1 ppi TFDP1   | EXPERIMENTS              |
| RB1 ppi CEBPB   | EXPERIMENTS              | RB1 ppi TFDP2   | EXPERIMENTS              |
| RB1 ppi CEBPD   | EXPERIMENTS              | TP53 ppi MAPK8  | EXPERIMENTS              |
| RB1 ppi CEBPE   | EXPERIMENTS              | TP53 ppi MAPK9  | EXPERIMENTS              |
| RPA1 ppi POLA1  | EXPERIMENTS              | TP53 ppi MAPK10 | EXPERIMENTS              |
| RPA3 ppi POLA1  | DATABASES                | TP53 ppi RPA1   | EXPERIMENTS              |
| RPA3 ppi POLA2  | DATABASES                | CDK2 ppi RPA3   | DATABASES                |
| RPA2 ppi UNG    | EXPERIMENTS              | CCNA2 ppi RPA3  | EXPERIMENTS              |
| CDC25A ppi CDK4 | DATABASES                | TP53 ppi RPA1   | EXPERIMENTS              |
| CDC25A ppi      | DATABASES                | RAD51 ppi       | EXPERIMENTS              |

|                    |             |                     |             |
|--------------------|-------------|---------------------|-------------|
| CDK6               |             | RPA1                |             |
| CDK4 ppi<br>CCND1  | EXPERIMENTS | RAD51 ppi<br>RPA3   | DATABASES   |
| CDK4 ppi<br>CDKN2A | EXPERIMENTS | RAD52 ppi<br>RPA1   | EXPERIMENTS |
| CDK4 ppi<br>CDKN2A | EXPERIMENTS | RAD52 ppi<br>RPA2   | EXPERIMENTS |
| CDK6 ppi<br>CDKN2A | EXPERIMENTS | RAD52 ppi<br>RPA3   | EXPERIMENTS |
| CDK7 ppi<br>CDK4   | EXPERIMENTS | RPA3 ppi<br>RAD23B  | DATABASES   |
| CDK7 ppi<br>CDK5   | EXPERIMENTS | RPA1 ppi<br>ERCC4   | EXPERIMENTS |
| CCNH ppi<br>CDK4   | DATABASES   | RPA3 ppi<br>ERCC4   | DATABASES   |
| CCNH ppi<br>CDK5   | EXPERIMENTS | RPA3 ppi<br>ERCC1   | DATABASES   |
| TFDP1 ppi<br>E2F1  | EXPERIMENTS | RPA3 ppi<br>GTF2H1  | DATABASES   |
| TFDP2 ppi<br>E2F1  | EXPERIMENTS | XPA ppi RPA1        | EXPERIMENTS |
| TFDP1 ppi<br>E2F4  | EXPERIMENTS | XPA ppi RPA3        | DATABASES   |
| TFDP2 ppi<br>E2F4  | EXPERIMENTS | XPA ppi RPA2        | EXPERIMENTS |
| TFDP1 ppi<br>E2F5  | EXPERIMENTS | XPC ppi RPA3        | DATABASES   |
| TFDP2 ppi<br>E2F5  | EXPERIMENTS | TP53 ppi<br>CSNK2A1 | EXPERIMENTS |

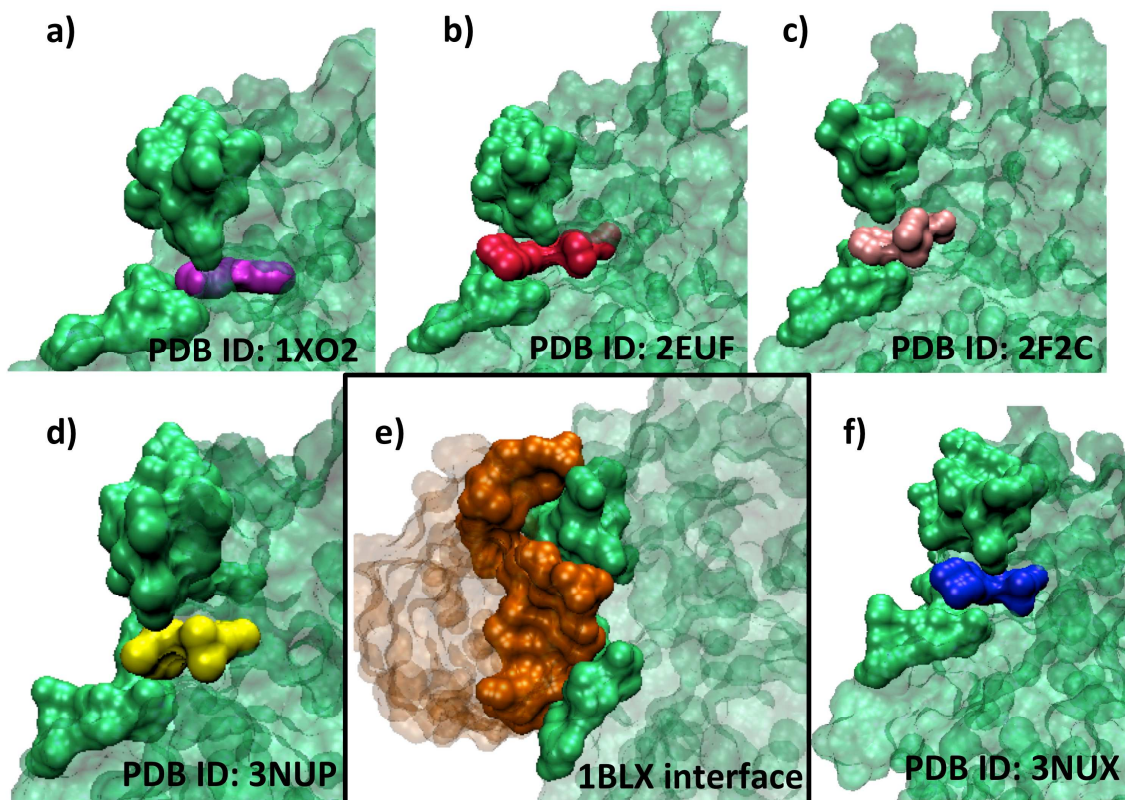

**Figure S11. CDK6 binding site (one chain of CDK6–CDKN2D interface) highlighted on CDK6-drug complexes present in PDB.** In each figure CDK6 structure is the transparent green body and the binding site on CDK6 is the opaque green one a) Fisetin-CDK6 complex b) PD-0332991-CDK6 complex, c) Aminopurvalanol-CDK6 complex, d) CHEBI: 792519-CDK6 complex, e) CDKN2D-CDK6 complex, f) CHEBI: 792520-CDK6 complex. The structures of CDK6 are not exactly the same in each PDB (please refer to Table S15 for the RMSD values of CDK6 structures), as a consequence we didn't perform a superimposition between CDK6-drug complexes and CDKN2D-CDK6 complex like we did in the Figure 5 of the main text.

**Table SI5. RMSD values of CDK6 structures.** We highlighted the RMSD values higher than 2.5 with red.

|         |        | CHAIN 2 |        |        |        |        |        |
|---------|--------|---------|--------|--------|--------|--------|--------|
| CHAIN 1 | RMSD   | 1BLX_A  | 1XO2_B | 2EUF_B | 2F2C_B | 3NUP_A | 3NUX_A |
|         | 1BLX_A | -       | 2.67   | 2.8    | 2.82   | 0.78   | 0.92   |
|         | 1XO2_B | 2.67    | -      | 0.88   | 1.06   | 1.69   | 1.77   |
|         | 2EUF_B | 2.8     | 0.88   | -      | 0.9    | 1.68   | 1.78   |
|         | 2F2C_B | 2.82    | 1.06   | 0.9    | -      | 1.95   | 1.98   |
|         | 3NUP_A | 0.78    | 1.69   | 1.68   | 1.95   | -      | 0.4    |
|         | 3NUX_A | 0.92    | 1.77   | 1.78   | 1.98   | 0.4    | -      |

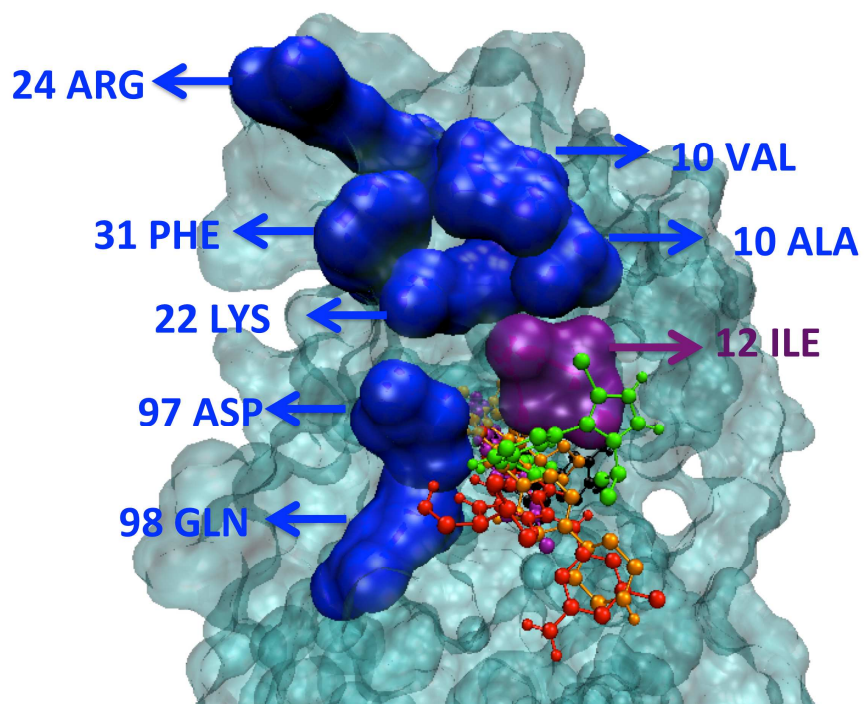

**Figure SI2.** The hotspots of CDK4 (dark blue surfaces), CDK4 structure (cyan transparent body) and the drugs (balls and sticks) docked on CDK4 can be seen all together in this figure. The drugs are close to hotspots 12 ILE, 98 GLN and 97 ASP.

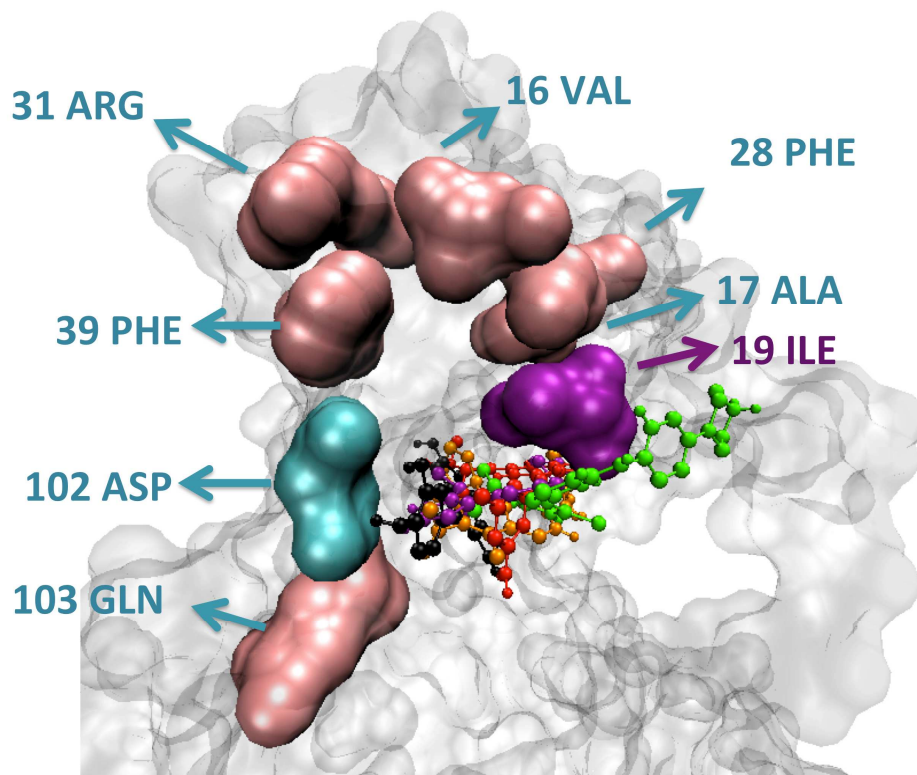

Figure SI3. The hotspots of CDK6 (pink surfaces), CDK6 structure (gray transparent body) and the drugs (balls and sticks) docked on CDK6 can be seen all together in this figure. The drugs are close to hotspots 19 ILE, 103 GLN and non-hotspot residue 102 ASP (cyan surface).

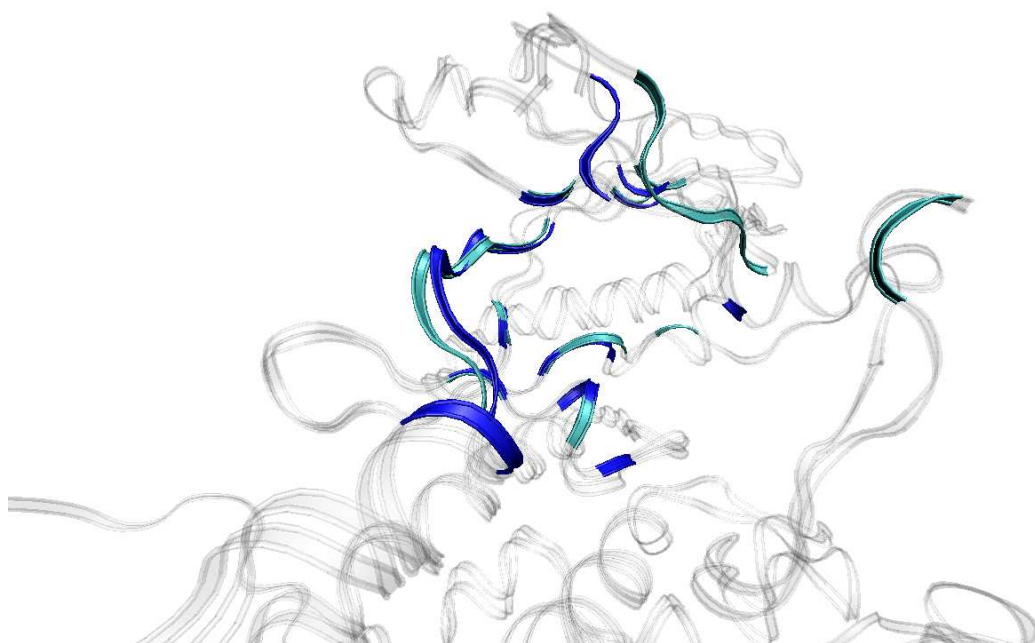

Figure SI4. Superimposition of pockets of CDK6 (cyan) and CDK4 (dark blue) using VMD visualization tool.



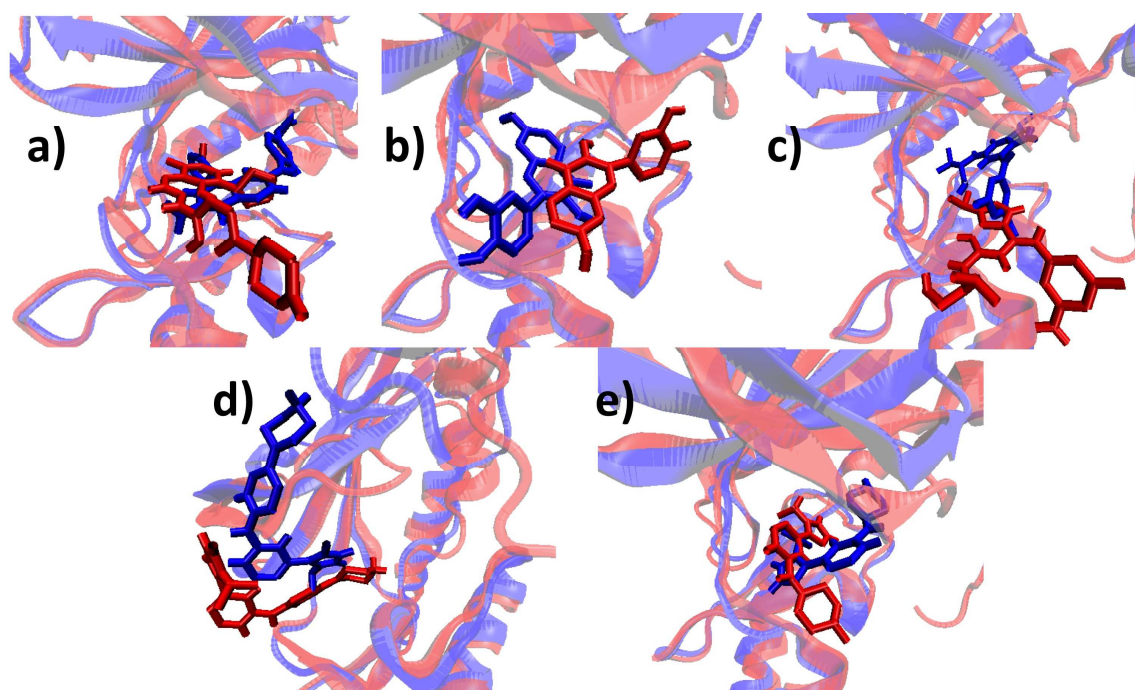

Figure S15. Superimposition of pockets of CDK6 (dark blue), CDK4 (red) and the drugs docked to them. The blue ligands are docked on CDK6 and the red ones are docked on CDK4. The ligands in the figures are: a) PD-0332991 b) Fisetin c) Aminopurvalanol d) CHEBI: 792520 e) CHEBI: 792519.
